# Supplementary material
Source: publisher figshare collection journal article supplement (https://asha.figshare.com/articles/dataset/_/14963667)
Supplement: Supplementary file 2 [file 1]

**Supplemental Table S1.** List of signs (*Speaking With Support of Signs*) from the key word signing training.

|                 |              |                    |                    |            |
|-----------------|--------------|--------------------|--------------------|------------|
| Afraid          | Dog          | I                  | Nothing            | Spring     |
| All             | Different    | In                 | Nurse              | Summer     |
| And             | Difficult    | Jesus              | Nut                | Tea        |
| Apple           | Drink        | Large (one-handed) | On                 | Teacher    |
| Autumn          | Dry dishes   | Learn              | Operation          | Thanks     |
| Banana          | Eat          | Leek               | Other              | Tired      |
| Beard           | Enough       | Lemonade           | Out                | Toilet     |
| Bear            | Farmer       | Lie                | Pain               | Tram       |
| Boy             | Fight        | Little bit         | Party              | Under      |
| Bottle          | Fire brigade | Machine            | Pink               | Vegetables |
| Brown           | First        | Many (a lot)       | Plant              | Wash up    |
| Burn            | Friend       | Marry              | Rise               | We         |
| Cherry          | Girl         | Menstruation       | Salt               | What       |
| Chicken         | Gnome        | Meat               | Same               | Wheelchair |
| Clothes         | Grass        | Middle             | Scarf              | Which      |
| Coffee          | Happy        | Mine               | Shop               | Who        |
| Cookie          | He           | Mommy              | Sit                | Winter     |
| Dance (classic) | House        | Monday             | Sign               | Year       |
| Daddy           | How          | Money              | Small (one-handed) | You        |
| Day             | How many     | More               | Sponge             | Your       |
