# Supplementary material
Source: publisher figshare collection journal article supplement (https://asha.figshare.com/articles/dataset/_/14963667)
Supplement: Supplementary file 3 [file 1]

**Supplemental Table S5.** Acceptability questionnaire.

| Items and answers                                                                                                                                           |               |                      |                  |                         |                   | Short term | Long term |
|-------------------------------------------------------------------------------------------------------------------------------------------------------------|---------------|----------------------|------------------|-------------------------|-------------------|------------|-----------|
| <b>A Indicate how often, outside of class, you have been practicing the signs you have learned during the course.</b>                                       |               |                      |                  |                         |                   | X          | X         |
| 1                                                                                                                                                           | 2             | 3                    | 4                | 5                       | 6                 |            |           |
| Not at all                                                                                                                                                  | Once          | Every two weeks      | Every week       | Multiple times per week | Every day         |            |           |
| <b>B Indicate how much you enjoyed the course.</b>                                                                                                          |               |                      |                  |                         |                   | X          |           |
| 1                                                                                                                                                           | 2             | 3                    | 4                | 5                       | 6                 |            |           |
| Did not enjoy at all                                                                                                                                        | Did not enjoy | Rather did not enjoy | Rather enjoyed   | Enjoyed                 | Enjoyed very much |            |           |
| <b>C Indicate how useful / meaningful you found the course to be.</b>                                                                                       |               |                      |                  |                         |                   | X          |           |
| 1                                                                                                                                                           | 2             | 3                    | 4                | 5                       | 6                 |            |           |
| Not useful at all                                                                                                                                           | Not useful    | Rather not useful    | Rather useful    | Useful                  | Very useful       |            |           |
| <b>D Indicate how confident you feel, after this course, to use <i>Speaking With Support of Signs</i> with clients who have an intellectual disability.</b> |               |                      |                  |                         |                   | X          | X         |
| 1                                                                                                                                                           | 2             | 3                    | 4                | 5                       | 6                 |            |           |
| Not confident at all                                                                                                                                        | Not confident | Rather not confident | Rather confident | Confident               | Very confident    |            |           |
| <b>E Indicate how well you estimate, after this course, you know the signs you have learned.</b>                                                            |               |                      |                  |                         |                   | X          | X         |
| 1                                                                                                                                                           | 2             | 3                    | 4                | 5                       | 6                 |            |           |
| Not well at all                                                                                                                                             | Not well      | Rather not well      | Rather well      | Well                    | Very well         |            |           |

Note. X = item was presented at this measurement.
