# Supplementary material
Source: publisher figshare collection journal article supplement (https://asha.figshare.com/articles/dataset/_/14963667)
Supplement: Supplementary file 4 [file 1]

**Supplemental Table S4.** Role play scenarios.

|           |                                                                                                                                                                                                                         |
|-----------|-------------------------------------------------------------------------------------------------------------------------------------------------------------------------------------------------------------------------|
| <b>1</b>  | The support worker wants to know what the client would like to eat for breakfast. The client takes little initiative. Finally the client answers: I would like chocolate. However, they have just run out of chocolate. |
| <b>2</b>  | The client needs to learn how to get dressed. The client is not familiar with the order in which to put on clothes.                                                                                                     |
| <b>3</b>  | The support worker discusses with the client what they will do on Saturday. They go over the day schedule. The client needs clarity, repetition, and short messages.                                                    |
| <b>4</b>  | The support worker shows the client how to make tea.                                                                                                                                                                    |
| <b>5</b>  | The client requests to read a book. The support worker wants to know what kind of book the client would like.                                                                                                           |
| <b>6</b>  | The client has been home during the weekend. The support worker asks how the weekend has been.                                                                                                                          |
| <b>7</b>  | The client and support worker are making vegetable soup. The client needs extensive guidance to perform the separate steps.                                                                                             |
| <b>8</b>  | The client would like to watch a television program, but cannot name it. The support worker tries to find out which television program the client is talking about.                                                     |
| <b>9</b>  | The support worker explains to the client what he/she still has to do before going to bed. Washing, brushing teeth, combing hair, ...                                                                                   |
| <b>10</b> | The client is feeling sad because his/her friend is ill. The friend has cancer. The support worker tries to talk about this with the client.                                                                            |
