# Supplementary material
Source: publisher figshare collection journal article supplement (https://asha.figshare.com/articles/dataset/_/14963667)
Supplement: Supplementary file 5 [file 1]

**Supplemental Table S3.** Examples of short sentences containing two to four key words.

|                                                                                    |
|------------------------------------------------------------------------------------|
| <b>Two key words</b>                                                               |
| The <u>nurse</u> asks if you're in <u>pain</u> .                                   |
| <u>Thanks</u> for the <u>party</u> .                                               |
| <u>What</u> <u>day</u> is it?                                                      |
| <b>Three key words</b>                                                             |
| <u>Bears</u> <u>sleep</u> during <u>winter</u> .                                   |
| <u>I</u> find it <u>difficult</u> to <u>lie</u> .                                  |
| <u>What</u> would <u>you</u> like to <u>eat</u> ?                                  |
| <b>Four key words</b>                                                              |
| I want a <u>little bit</u> of <u>meat</u> with <u>a lot</u> of <u>vegetables</u> . |
| <u>First</u> , <u>we</u> are going to <u>dance</u> at the <u>party</u> .           |
| <u>I</u> have <u>drunk</u> <u>enough</u> <u>tea</u> .                              |

*Note.* Underlined words are the key words that had to be signed.
