# Supplementary material
Source: publisher figshare collection journal article supplement (https://asha.figshare.com/articles/dataset/_/14963667)
Supplement: Supplementary file 8 [file 1]

**Supplemental Table S2.** Compound signs.

| <b>Concept</b> | <b>First Sign</b> | <b>Second sign</b> |
|----------------|-------------------|--------------------|
| Apple sauce    | Apple             | Stir               |
| Banana milk    | Banana            | Milk               |
| Fireman        | Fire              | Man                |
| School         | Learn             | House              |
| Doghouse       | Dog               | House              |
| Walnut tree    | Nut               | Tree               |
| Dishwasher     | Washing dishes    | Machine            |
| Café           | Drink             | House              |
| Chick          | Small             | Chicken            |
| Wedding dress  | Marry             | Dress              |
| Birthday       | Year              | Day                |
| New year       | New               | Year               |
| Vegetable soup | Vegetable         | Soup               |
| Apple juice    | Apple             | Drink              |
| Cola           | Brown             | Lemonade           |
| Factory        | Machine           | House              |
| Living room    | Sit               | Room               |
