# Supplementary material
Source: publisher figshare collection journal article supplement (https://asha.figshare.com/articles/dataset/_/14963667)

**Supplemental Figure S2.** Examples of performance photos from reminder.

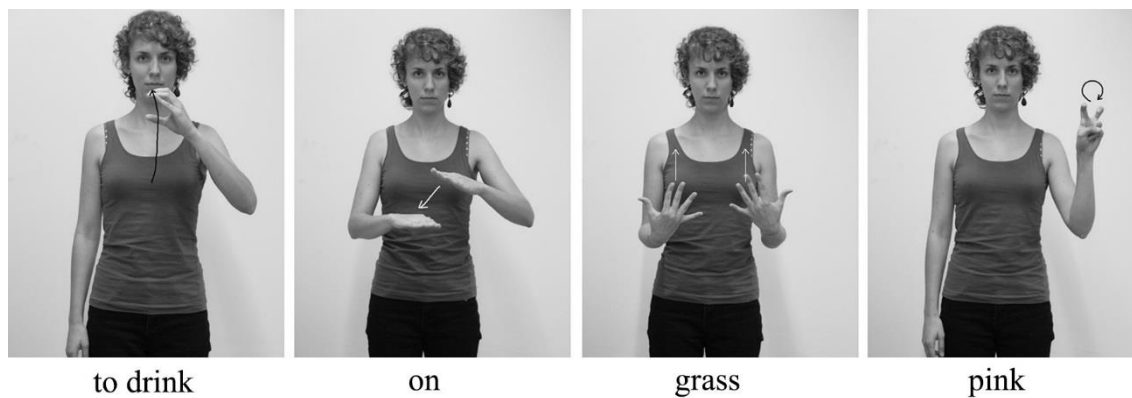

Supplement: Supplementary file 1 [file 1]

**Supplemental Figure S1.** Signing accuracy per training method and measurement time.

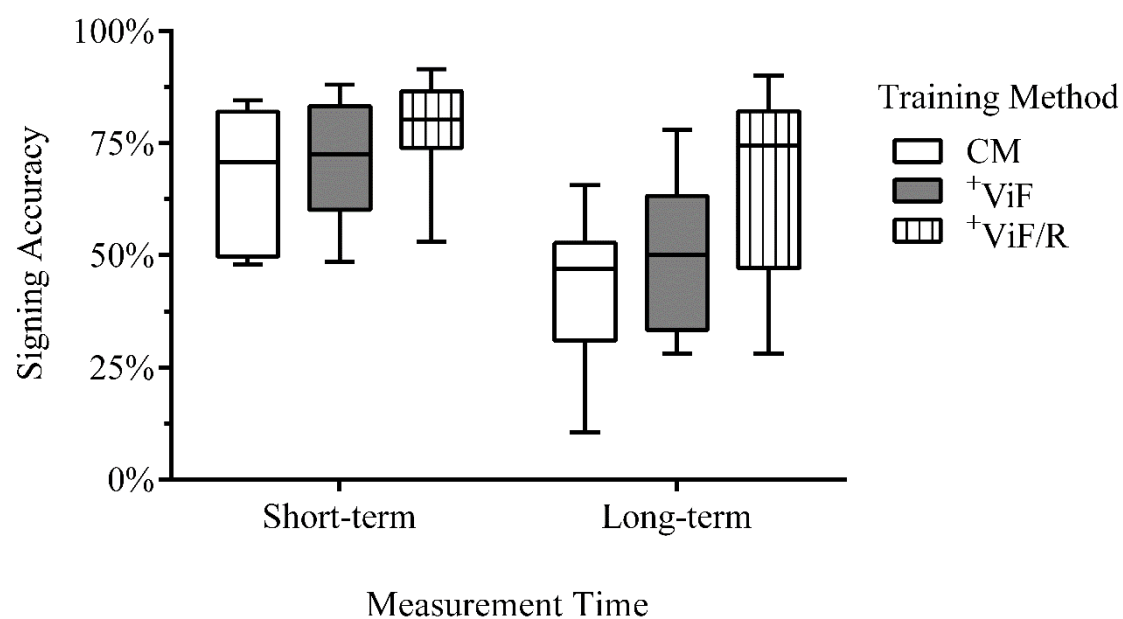

Supplement: Supplementary file 7 [file 1]
